# Supplementary material for: Ryugu’s nucleosynthetic heritage from the outskirts of the Solar System
Source: PubMed Central journal article supplement — Sci Adv. 2022 Nov 16;8(46):eadd8141. doi: 10.1126/sciadv.add8141 (PMC11627214; doi:10.1126/sciadv.add8141), 2022-11-16
Supplement: sciadv.add8141_sm.pdf [file sciadv.add8141_sm.pdf]

Supplementary Materials for  
**Ryugu's nucleosynthetic heritage from the outskirts of the Solar System**

Timo Hopp *et al.*

Corresponding author: Timo Hopp, hopp@mps.mpg.de

*Sci. Adv.* **8**, eadd8141 (2022)  
DOI: 10.1126/sciadv.add8141

**This PDF file includes:**

Figs. S1 to S4  
Tables S1 and S2  
References

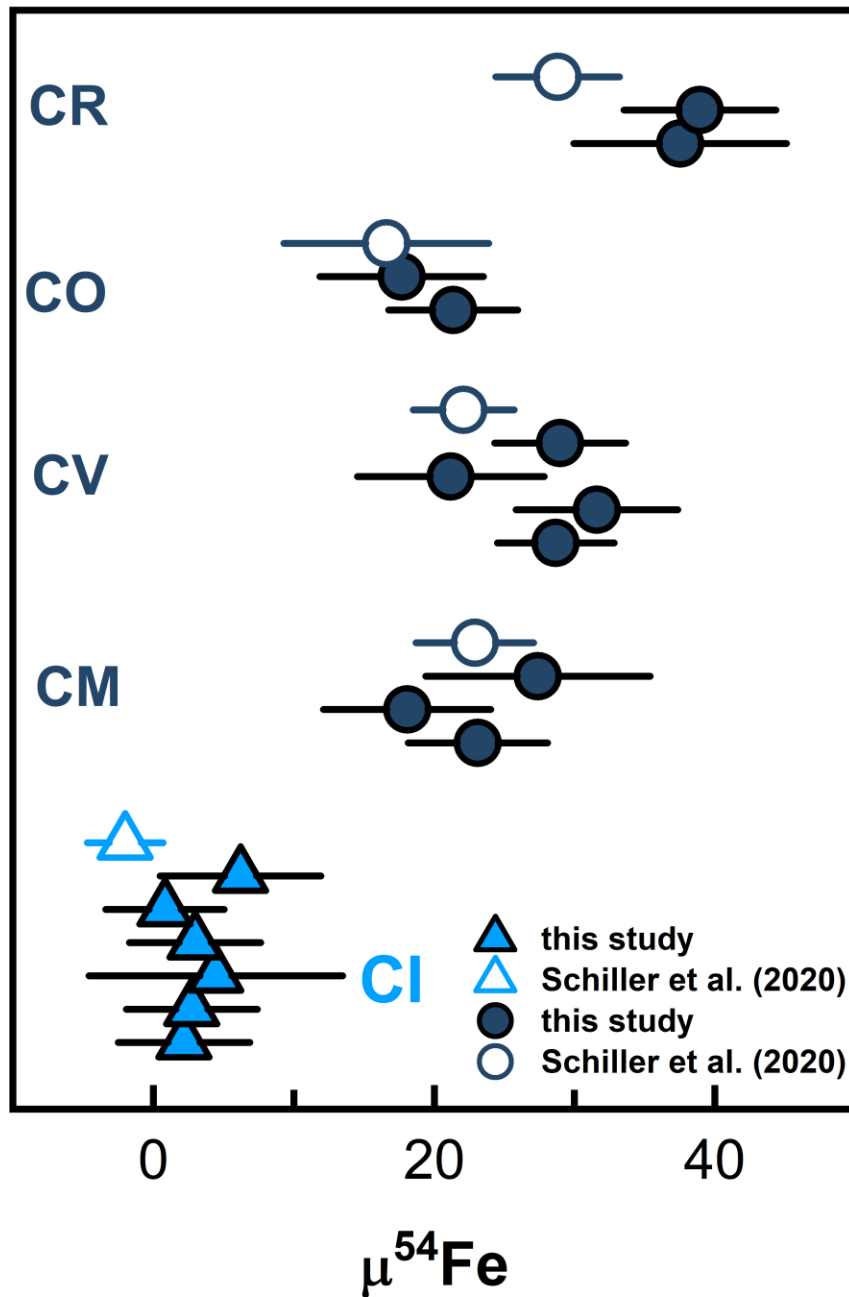

**Fig. S1. Comparison of  $\mu^{54}\text{Fe}$  values of carbonaceous chondrites determined in this study with literature data of (22). The data from this study agree with previous studies. Uncertainties of individual samples are 95% confidence intervals calculated from replicate analysis (N=14-30).**

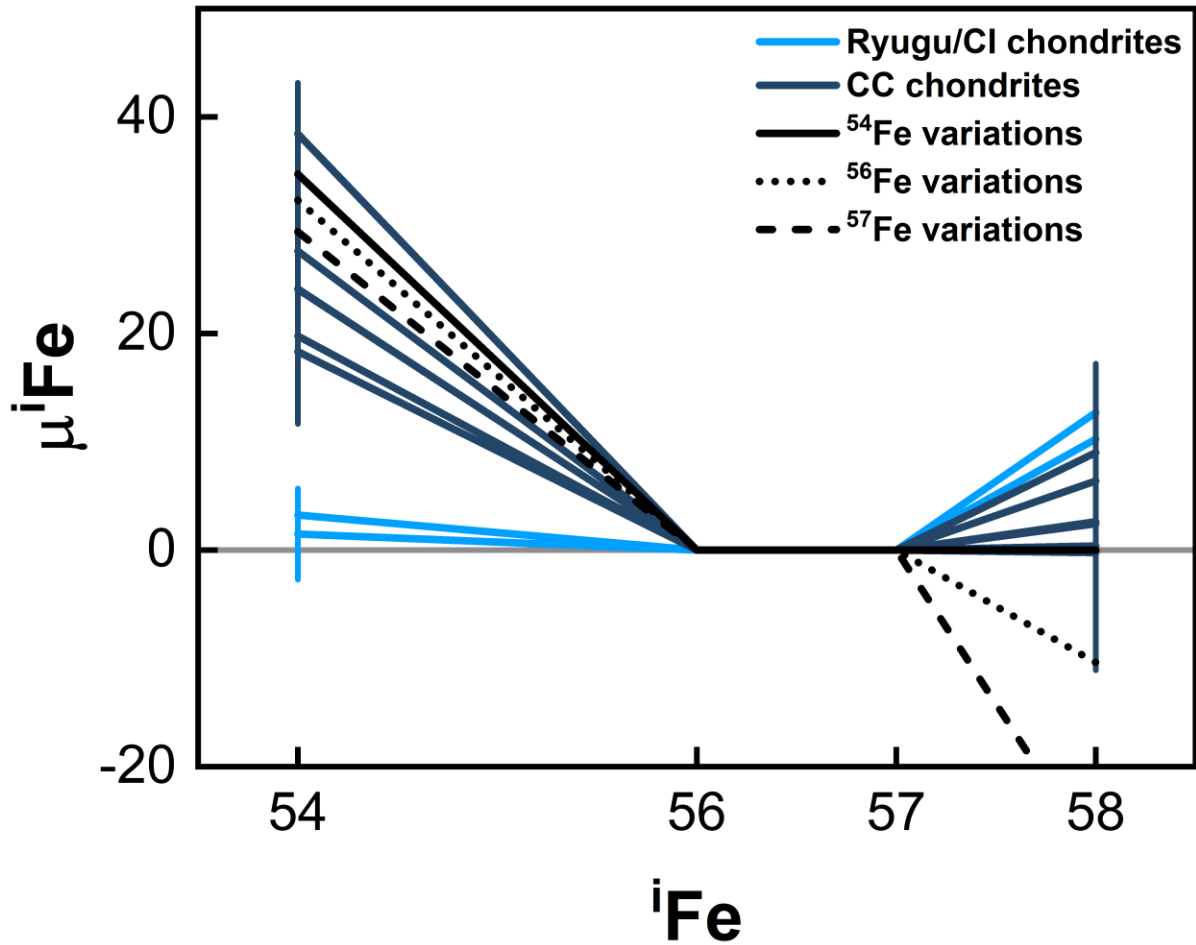

**Fig. S2. Average nucleosynthetic isotopic anomalies of carbonaceous chondrites and Ryugu samples normalized to  $^{57}\text{Fe}/^{56}\text{Fe}$ .** All carbonaceous chondrites except CI chondrites and Ryugu display resolvable  $\mu^{54}\text{Fe}$  (dark blue lines). The  $\mu^{58}\text{Fe}$  values of most carbonaceous chondrites are not resolvable from the terrestrial standard. While the calculated averages of CI chondrites and Ryugu display excesses in  $\mu^{58}\text{Fe}$  resolvable from the standard, these are not resolvable from the other carbonaceous chondrites. Comparison with expected anomalies produced by individual variations in  $^{54}\text{Fe}$ ,  $^{56}\text{Fe}$ , and  $^{57}\text{Fe}$  (black lines) reveals that the observed  $\mu^{54}\text{Fe}$  anomalies are best explained by  $^{54}\text{Fe}$  variations (24). Exposure to galactic cosmic rays induces positive shifts in  $\mu^{54}\text{Fe}$  that correlate with negative shifts in  $\mu^{58}\text{Fe}$  (24, 26). If Fe isotopic compositions of CI chondrites and Ryugu had been affected by exposure to galactic cosmic rays, their primary Fe isotopic compositions would be even more distinct from other carbonaceous chondrites than they are because the pre-exposure  $\mu^{54}\text{Fe}$  and  $\mu^{58}\text{Fe}$  values would shift towards more negative and positive values, respectively.

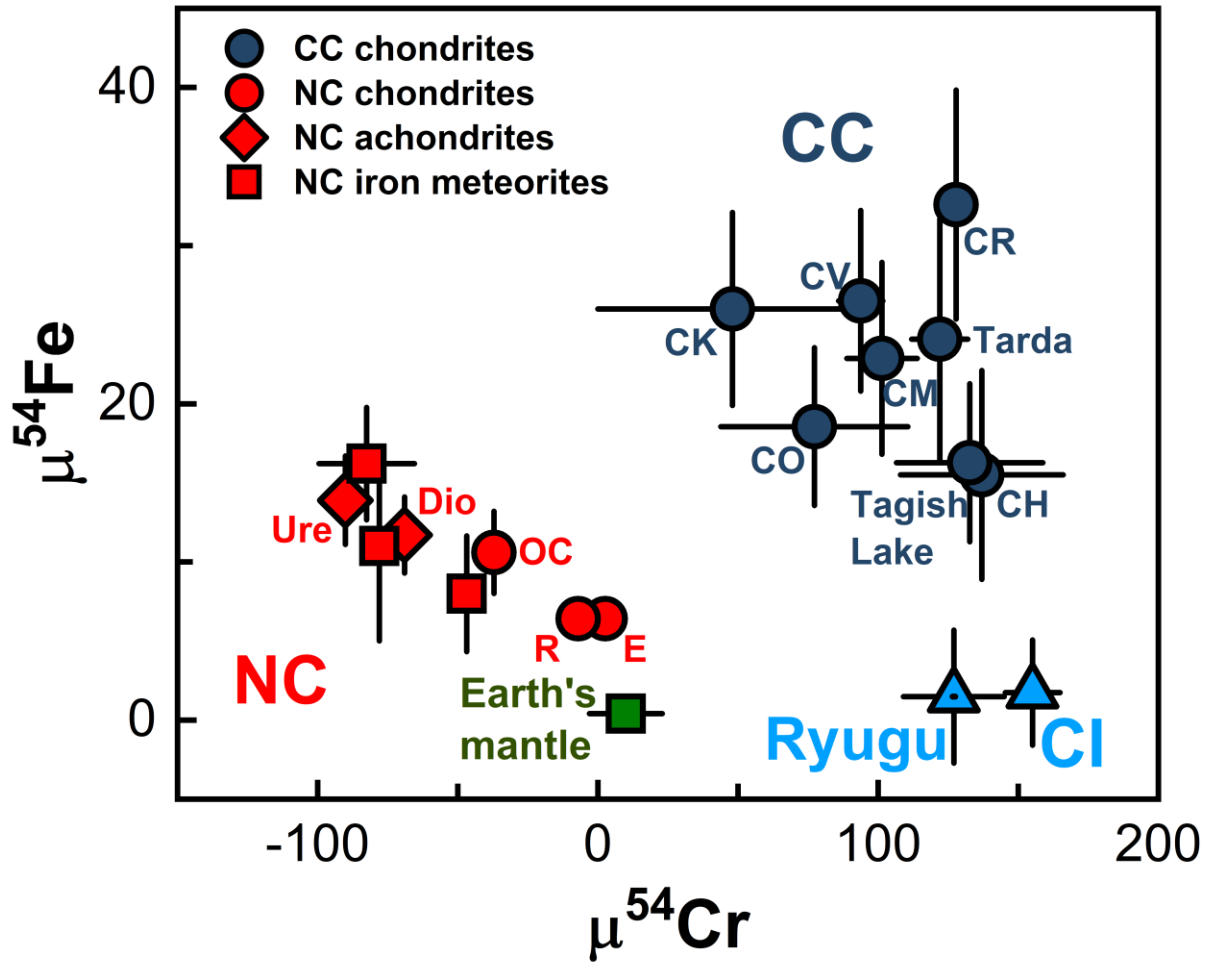

**Fig. S3. Isotopic anomalies of Fe and Cr in Ryugu and other Solar System materials.** The average  $\mu^{54}\text{Fe}$  and  $\mu^{54}\text{Cr}$  data of Ryugu samples are from this study and (6). The average compositions of non-carbonaceous (NC) and carbonaceous (CC) meteorite groups and Earth's mantle (BSE) are given in the data compilation Table S1 and are calculated using data from this study and the data compilation of (64). Uncertainties for individual groups are the 95% confidence interval of the mean. E-enstatite; R-rumuruti; OC-ordinary chondrites; Ure=ureilites; Dio=diogenites. Error bars that are not visible smaller than symbols.

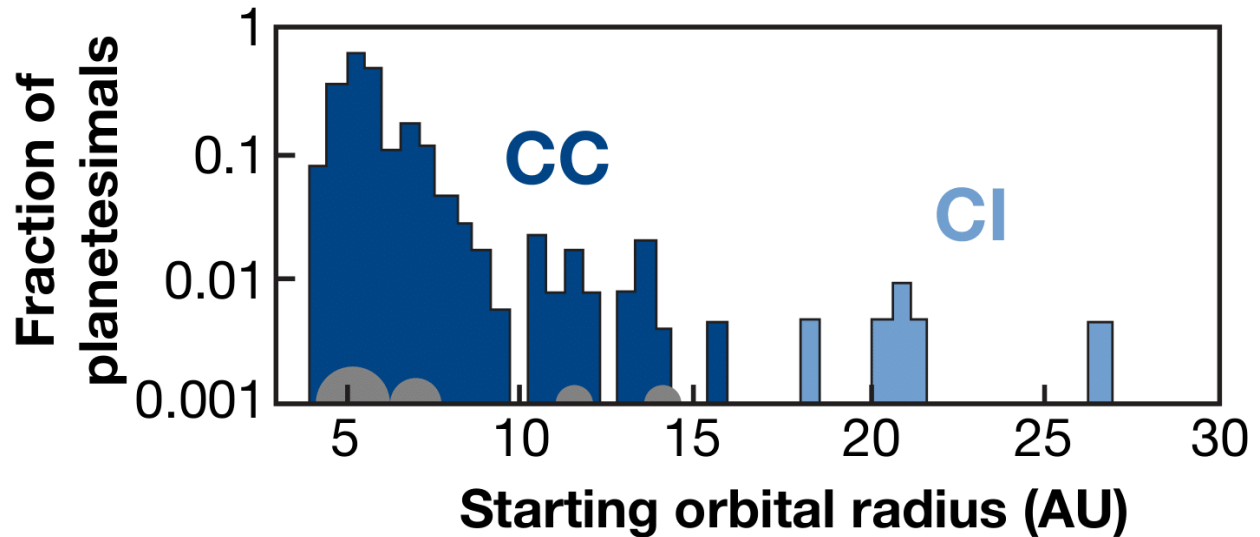

**Fig. S4. Example of possible source regions for CC and CI asteroids in the Main Belt [modified from Fig. 12 of (39)].** This figure depicts the fractions of asteroids from different starting orbital radii that are implanted into the Main Belt in a simulation involving the growth and migration of the gas and ice giant planets. In that simulation, Jupiter, Saturn, Uranus, and Neptune start with initial orbital radii of 10, 15, 20, and 25 AU and grow and migrate inwards on a timescale of  $\sim 2.5$  Myr (39). As shown, the processes of planetesimal excitation by the giant planets and interaction with nebular gas leads to a far-reaching and uneven sampling of planetesimals. We speculate that CC chondrites could have formed in the birth region of Jupiter and Saturn while CI chondrites and Ryugu derived from planetesimals that could have been implanted into the Main Belt by the growth and migration of Uranus and Neptune, explaining their distinct isotopic and chemical heritage. While the fraction of planetesimals implanted into the Main Belt from the outskirts of the Solar System (e.g., CI) is small ( $\sim 1\%$  of the planetesimals located in these regions are implanted into the Main Belt), the total number of planetesimals from these regions implanted into the Main Belt can be significant if the total mass in that source region is higher. This could explain why up to 20% of carbonaceous (C-type) asteroids are of Cb-type.

**Table S1: Average O, Ti, Cr, and Fe isotopic anomalies of Ryugu, meteorites, and Earth's mantle.** Averages adopted from the data compilation of (65) and (64) and updated with more recently published data.

| Samples                                 | Reservoir | $\Delta^{17}\text{O}$ | $\pm$ | 95% CI | $\mu^{50}\text{Ti}$ | $\pm$ | 95% CI | $\mu^{54}\text{Cr}$ | $\pm$ | 95% CI | $\mu^{54}\text{Fe}$ | $\pm$ | 95% CI | $\mu^{58}\text{Fe}$ | $\pm$ | 95% CI |
|-----------------------------------------|-----------|-----------------------|-------|--------|---------------------|-------|--------|---------------------|-------|--------|---------------------|-------|--------|---------------------|-------|--------|
| <b>Hayabusa2</b>                        |           |                       |       |        |                     |       |        |                     |       |        |                     |       |        |                     |       |        |
| Ryugu A                                 | CC        |                       | $\pm$ |        | 163                 | $\pm$ | 20     | 135                 | $\pm$ | 21     | 0                   | $\pm$ | 4      | 12                  | $\pm$ | 4      |
| Ryugu C                                 | CC        |                       | $\pm$ |        | 202                 | $\pm$ | 19     | 125                 | $\pm$ | 10     | 3                   | $\pm$ | 3      | 13                  | $\pm$ | 4      |
| Ryugu Mean                              | CC        | 0.61                  | $\pm$ | 0.08   | 183                 | $\pm$ | 27     | 127                 | $\pm$ | 18     | 1                   | $\pm$ | 4      | 13                  | $\pm$ | 4      |
| <b>Chondrites</b>                       |           |                       |       |        |                     |       |        |                     |       |        |                     |       |        |                     |       |        |
| CI                                      | CC        | 0.39                  | $\pm$ | 0.10   | 189                 | $\pm$ | 15     | 155                 | $\pm$ | 10     | 2                   | $\pm$ | 3      | 10                  | $\pm$ | 7      |
| CM                                      | CC        | -2.92                 | $\pm$ | 0.44   | 301                 | $\pm$ | 10     | 101                 | $\pm$ | 13     | 23                  | $\pm$ | 6      | 5                   | $\pm$ | 6      |
| CV                                      | CC        | 3.62                  | $\pm$ | 0.48   | 345                 | $\pm$ | 19     | 94                  | $\pm$ | 8      | 27                  | $\pm$ | 6      | 0                   | $\pm$ | 7      |
| CO                                      | CC        | -4.32                 | $\pm$ | 0.26   | 377                 | $\pm$ | 99     | 77                  | $\pm$ | 33     | 19                  | $\pm$ | 5      | 1                   | $\pm$ | 2      |
| CK                                      | CC        | -4.47                 | $\pm$ | 0.21   | 342                 | $\pm$ | 105    | 48                  | $\pm$ | 42     | 26                  | $\pm$ | 6      |                     | $\pm$ |        |
| CR                                      | CC        | -1.48                 | $\pm$ | 0.55   | 251                 | $\pm$ | 45     | 128                 | $\pm$ | 7      | 33                  | $\pm$ | 7      |                     | $\pm$ |        |
| CH                                      | CC        | -1.55                 |       | 0.27   |                     |       |        | 137                 | $\pm$ | 29     | 16                  | $\pm$ | 7      | 9                   | $\pm$ | 0      |
| CB                                      | CC        |                       |       |        | 204                 |       | 7      | 120                 |       | 9      |                     |       |        |                     |       |        |
| Tagish Lake                             | CC        | -0.91                 | $\pm$ | 0.53   | 276                 | $\pm$ | 26     | 133                 | $\pm$ | 26     | 16                  | $\pm$ | 5      | 2                   | $\pm$ | 12     |
| Tarda                                   | CC        |                       |       |        |                     |       |        | 122                 | $\pm$ | 10     | 24                  | $\pm$ | 8      | 3                   | $\pm$ | 12     |
| EC                                      | NC        | -0.02                 | $\pm$ | 0.05   | -20                 | $\pm$ | 8      | 3                   | $\pm$ | 3      | 6                   | $\pm$ | 1      |                     |       |        |
| OC                                      | NC        | 0.98                  | $\pm$ | 0.48   | -66                 | $\pm$ | 6      | -37                 | $\pm$ | 6      | 11                  | $\pm$ | 3      |                     |       |        |
| R                                       | NC        | 2.64                  | $\pm$ | 0.15   |                     | $\pm$ |        | -7                  | $\pm$ | 3      | 6                   | $\pm$ | 1      |                     |       |        |
| <b>Achondrites/<br/>Iron meteorites</b> |           |                       |       |        |                     |       |        |                     |       |        |                     |       |        |                     |       |        |
| Diogenites                              | NC        | -0.29                 | $\pm$ | 0.08   | -123                | $\pm$ | 5      | -69                 | $\pm$ | 8      | 14                  | $\pm$ | 3      |                     |       |        |
| Ureilites                               | NC        | -1.16                 | $\pm$ | 0.15   | -200                | $\pm$ | 32     | -90                 | $\pm$ | 4      | 12                  | $\pm$ | 2      |                     |       |        |
| IIAB                                    | NC        |                       |       |        |                     |       |        | -83                 |       | 17     | 16                  | $\pm$ | 4      |                     |       |        |
| IIIAB                                   | NC        |                       |       |        |                     |       |        | -78                 |       | 6      | 11                  | $\pm$ | 6      |                     |       |        |
| IVA                                     | NC        |                       |       |        |                     |       |        | -47                 |       | 6      | 8                   | $\pm$ | 4      |                     |       |        |
| <b>Earth's mantle</b>                   |           | 0                     | $\pm$ | 0      | -2                  | $\pm$ | 3      | 10                  | $\pm$ | 13     | 0                   | $\pm$ | 1      | 1                   | $\pm$ | 5      |

**Data sources:** O – Data compilation of (65) and (6); Ti – (6, 10, 66–70); Cr – (6, 11, 29, 30, 66, 67, 69–85); Fe – (22–24, 26).

**Table S2: Fe isotopic data of samples investigated in this study.** Calculated mass-independent ( $\mu^{54}\text{Fe}$ ,  $\mu^{58}\text{Fe}$ ) and mass-dependent ( $\delta^{56}\text{Fe}$ ) Fe isotopic compositions in Ryugu samples, carbonaceous chondrites, and geostandards. Uncertainties of individual samples are 95% confidence intervals of the mean of standard-sample-standard bracketing analyses (N). The chemical procedure used at Tokyo Institute of Technology is described in the Methods and (6). Samples processed at the University of Chicago (UofC) were digestion aliquots taken after digestion with HF-HNO<sub>3</sub>-HCl-HClO<sub>4</sub> mixtures. Matrix aliquots containing the bulk Fe of samples processed at the Institut für Planetologie Münster (IfP) were digested HF-HNO<sub>3</sub>-HCl-HClO<sub>4</sub> mixtures and then separated from Sr using cation exchange resin (AG50W-X8). All samples, regardless of their processing at the Tokyo Institute of Technology or Institut für Planetologie, Münster were further processed at the University of Chicago to purify Fe.\*Samples for which soluble organic matter was extracted prior digestion. †Sample analyzed with XRF before digestion.

| Sample             | Mass digested (g) | Mass homogenized (g) | Processed?          | N  | $\mu^{54}\text{Fe}$ | $\mu^{58}\text{Fe}$ | $\delta^{56}\text{Fe}$ | $\delta^{57}\text{Fe}$ | $\delta^{58}\text{Fe}$ |
|--------------------|-------------------|----------------------|---------------------|----|---------------------|---------------------|------------------------|------------------------|------------------------|
| <i>Ryugu</i>       |                   |                      |                     |    |                     |                     |                        |                        |                        |
| A0106*             | 0.0146            | 0.0175               | Fe, U (Tokyo Tech)  | 30 | -2±5                | 14±14               | -0.01±0.02             | -0.01±0.02             | 0.00±0.05              |
| A0106-A0107        | 0.0239            | 0.0289               | Fe, U (Tokyo Tech)  | 30 | 2±5                 | 10±10               | -0.01±0.02             | -0.02±0.03             | -0.08±0.05             |
| C0107*             | 0.0128            | 0.0174               | Fe, U (Tokyo Tech)  | 25 | 4±4                 | 15±17               | -0.02±0.02             | -0.03±0.03             | -0.02±0.05             |
| C0108†             | 0.0222            | 0.0333               | Fe, U (Tokyo Tech)  | 25 | 2±5                 | 11±7                | 0.01±0.02              | 0.02±0.03              | 0.03±0.05              |
| <i>CI</i>          |                   |                      |                     |    |                     |                     |                        |                        |                        |
| Orgueil-1          | 0.401             | 1.12                 | Sr matrix cut (IfP) | 30 | 2±5                 | 12±8                | -0.02±0.02             | -0.02±0.03             | -0.02±0.05             |
| Orgueil-2          | 0.012             | ~0.1                 | Fe (UofC)           | 30 | 3±5                 | 2±11                | 0.01±0.02              | 0.02±0.03              | 0.02±0.05              |
| Orgueil-3          | 0.010             | ~0.1                 | Fe (UofC)           | 14 | 4±9                 | 3±12                | 0.00±0.02              | 0.00±0.03              | 0.00±0.05              |
| Orgueil-4          | 0.020             | 0.050                | Fe, U (Tokyo Tech)  | 30 | 3±5                 | 12±8                | 0.06±0.02              | 0.09±0.03              | 0.13±0.05              |
| Ivuna              | 0.099             | ~0.1                 | Fe (UofC)           | 30 | 1±4                 | 16±11               | 0.00±0.02              | 0.00±0.03              | 0.01±0.05              |
| Alais              | 0.022             | 0.051                | Fe, U (Tokyo Tech)  | 28 | 6±6                 | 17±12               | -0.02±0.02             | -0.02±0.03             | -0.01±0.05             |
| <i>CM</i>          |                   |                      |                     |    |                     |                     |                        |                        |                        |
| Murchison-1        | 0.010             | ~0.3                 | Fe (UofC)           | 14 | 23±5                | 6±7                 | 0.00±0.02              | 0.01±0.03              | 0.03±0.05              |
| Murchison-2        | 0.025             | 1.65                 | Fe, U (Tokyo Tech)  | 15 | 18±6                | 2±9                 | 0.01±0.02              | 0.03±0.03              | 0.05±0.05              |
| Mighei             | 0.011             | ~0.1                 | Fe (UofC)           | 14 | 27±8                | 7±9                 | -0.01±0.02             | 0.00±0.03              | 0.01±0.05              |
| <i>CV</i>          |                   |                      |                     |    |                     |                     |                        |                        |                        |
| Allende-1          | 0.012             | ~4000 (USNM)         | Fe (UofC)           | 15 | 29±4                | 2±9                 | -0.02±0.02             | -0.02±0.03             | -0.01±0.05             |
| Allende-2          | 0.514             | ~100 g (MS-A)        | Sr matrix cut (IfP) | 15 | 32±6                | 2±9                 | -0.05±0.02             | -0.06±0.03             | -0.07±0.05             |
| Allende-3          | 0.025             | ~4000 (USNM)         | Fe, U (Tokyo Tech)  | 15 | 21±7                | 3±12                | 0.08±0.02              | 0.13±0.03              | 0.18±0.05              |
| Vigarano           | 0.014             | ~0.3                 | Fe (UofC)           | 15 | 29±5                | -7±13               | 0.02±0.02              | 0.05±0.03              | 0.07±0.05              |
| <i>CO</i>          |                   |                      |                     |    |                     |                     |                        |                        |                        |
| Ornans             | 0.041             | ~0.3                 | Fe (UofC)           | 15 | 21±5                | 0±8                 | -0.03±0.02             | -0.03±0.03             | -0.04±0.05             |
| Lance              | 0.092             | ~0.5                 | Fe (UofC)           | 15 | 18±5                | 1±10                | 0.01±0.02              | 0.03±0.03              | 0.04±0.05              |
| <i>CR</i>          |                   |                      |                     |    |                     |                     |                        |                        |                        |
| Acfer 139          | 0.525             | 0.525                | Mo matrix cut (IfP) | 14 | 38±8                | 9±11                | -0.11±0.02             | -0.15±0.03             | -0.17±0.05             |
| GRA 06100          | 0.281             | 0.281                | Sr matrix cut (IfP) | 15 | 39±5                | 9±6                 | 0.00±0.02              | 0.02±0.03              | 0.04±0.05              |
| <i>Ungrouped</i>   |                   |                      |                     |    |                     |                     |                        |                        |                        |
| Tagish Lake-1      | 0.486             | 1.5                  | Sr matrix cut (IfP) | 15 | 18±7                | 2±14                | -0.03±0.02             | -0.04±0.03             | -0.04±0.05             |
| Tagish Lake-2      | 0.025             | 1.06                 | Fe, U (Tokyo Tech)  | 15 | 15±6                | 2±22                | 0.05±0.02              | 0.08±0.03              | 0.11±0.05              |
| Tarda              | 0.025             | 0.212                | Fe, U (Tokyo Tech)  | 30 | 24±8                | 3±12                | -0.01±0.02             | 0.00±0.03              | 0.01±0.05              |
| <i>Geostandard</i> |                   |                      |                     |    |                     |                     |                        |                        |                        |
| BHVO-2-1           | 0.012             | -                    | Fe (UofC)           | 15 | 1±7                 | -9±8                | 0.09±0.02              | 0.14±0.03              | 0.18±0.05              |
| BHVO-2-2           | 0.010             | -                    | Fe (UofC)           | 15 | 1±7                 | -1±11               | 0.06±0.02              | 0.10±0.03              | 0.13±0.05              |
| AGV-2              | 0.012             | -                    | Fe (UofC)           | 30 | 2±4                 | 1±6                 | 0.08±0.02              | 0.13±0.03              | 0.16±0.05              |

## REFERENCES AND NOTES

1. F. E. DeMeo, B. J. Burt, M. Marsset, D. Polishook, T. H. Burbine, B. Carry, R. P. Binzel, P. Vernazza, V. Reddy, M. Tang, C. A. Thomas, A. S. Rivkin, N. A. Moskovitz, S. M. Slivan, S. J. Bus, Connecting asteroids and meteorites with visible and near-infrared spectroscopy. *Icarus* **380**, 114971 (2022).
2. L. T. Elkins-Tanton, E. Asphaug, J. F. Bell, C. J. Bierson, B. G. Bills, W. F. Bottke, S. W. Courville, S. D. Dobb, I. Jun, D. J. Lawrence, S. Marchi, T. J. McCoy, J. M. G. Merayo, R. Oran, J. G. O'Rourke, R. S. Park, P. N. Peplowski, T. H. Prettyman, C. A. Raymond, B. P. Weiss, M. A. Wieczorek, M. T. Zuber, Distinguishing the origin of asteroid (16) Psyche. *Space Sci. Rev.* **218**, 17 (2022).
3. D. S. Loretta, C. W. Hergenrother, S. R. Chesley, J. M. Leonard, J. Y. Pelgrift, C. D. Adam, M. Al Asad, P. G. Antreasian, R. L. Ballouz, K. J. Becker, C. A. Bennett, B. J. Bos, W. F. Bottke, M. Brozović, H. Campins, H. C. Connolly, M. G. Daly, A. B. Davis, J. de León, D. N. DellaGiustina, C. Y. Drouet d'Aubigny, J. P. Dworkin, J. P. Emery, D. Farnocchia, D. P. Glavin, D. R. Golish, C. M. Hartzell, R. A. Jacobson, E. R. Jawin, P. Jenniskens, J. N. Kidd, E. J. Lessac-Chenen, J. Y. Li, G. Libourel, J. Licandro, A. J. Liounis, C. K. Maleszewski, C. Manzoni, B. May, L. K. McCarthy, J. W. McMahon, P. Michel, J. L. Molaro, M. C. Moreau, D. S. Nelson, W. M. Owen, B. Rizk, H. L. Roper, B. Rozitis, E. M. Sahr, D. J. Scheeres, J. A. Seabrook, S. H. Selznick, Y. Takahashi, F. Thuillet, P. Tricarico, D. Vokrouhlický, C. W. V. Wolner, Episodes of particle ejection from the surface of the active asteroid (101955) Bennu. *Science* **366**, eaay3544 (2019).
4. H. Campins, J. de León, A. Morbidelli, J. Licandro, J. Gayon-Markt, M. Delbo, P. Michel, The origin of asteroid 162173 (1999 JU3). *Astron. J.* **146**, 26 (2013).
5. S. Tachibana, H. Sawada, R. Okazaki, Y. Takano, K. Sakamoto, Y. N. Miura, C. Okamoto, H. Yano, S. Yamanouchi, P. Michel, Y. Zhang, S. Schwartz, F. Thuillet, H. Yurimoto, T. Nakamura, T. Noguchi, H. Yabuta, H. Naraoka, A. Tsuchiyama, N. Imae, K. Kurosawa, A. M. Nakamura, K. Ogawa, S. Sugita, T. Morota, R. Honda, S. Kameda, E. Tatsumi, Y. Cho, K. Yoshioka, Y. Yokota, M. Hayakawa, M. Matsuoka, N. Sakatani, M. Yamada, T. Kouyama, H.



Suzuki, C. Honda, T. Yoshimitsu, T. Kubota, H. Demura, T. Yada, M. Nishimura, K. Yogata, A. Nakato, M. Yoshitake, A. I. Suzuki, S. Furuya, K. Hatakeda, A. Miyazaki, K. Kumagai, T. Okada, M. Abe, T. Usui, T. R. Ireland, M. Fujimoto, T. Yamada, M. Arakawa, H. C. Connolly Jr, A. Fujii, S. Hasegawa, N. Hirata, C. Hirose, S. Hosoda, Y. Iijima, H. Ikeda, M. Ishiguro, Y. Ishihara, T. Iwata, S. Kikuchi, K. Kitazato, D. S. Lauretta, G. Libourel, B. Marty, K. Matsumoto, T. Michikami, Y. Mimasu, A. Miura, O. Mori, K. Nakamura-Messenger, N. Namiki, A. N. Nguyen, L. R. Nittler, H. Noda, R. Noguchi, N. Ogawa, G. Ono, M. Ozaki, H. Senshu, T. Shimada, Y. Shimaki, K. Shirai, S. Soldini, T. Takahashi, Y. Takei, H. Takeuchi, R. Tsukizaki, K. Wada, Y. Yamamoto, K. Yoshikawa, K. Yumoto, M. E. Zolensky, S. Nakazawa, F. Terui, S. Tanaka, T. Saiki, M. Yoshikawa, S. Watanabe, Y. Tsuda, Pebbles and sand on asteroid (162173) Ryugu: In situ observation and particles returned to Earth. *Science* **375**, 1011–1016 (2022).

6. T. Yokoyama, K. Nagashima, I. Nakai, E. D. Young, Y. Abe, J. Aléon, C. M. O'D. Alexander, S. Amari, Y. Amelin, K.-I. Bajo, M. Bizzarro, A. Bouvier, R. W. Carlson, M. Chaussidon, B.-G. Choi, N. Dauphas, A. M. Davis, T. di Rocco, W. Fujiya, R. Fukai, I. Gautam, M. K. Haba, Y. Hibiya, H. Hidaka, H. Homma, P. Hoppe, G. R. Huss, K. Ichida, T. Iizuka, T. R. Ireland, A. Ishikawa, M. Ito, S. Itoh, N. Kawasaki, N. T. Kita, K. Kitajima, T. Kleine, S. Komatani, A. N. Krot, M.-C. Liu, Y. Masuda, K. D. Mckeegan, M. Morita, K. Motomura, F. Moynier, A. Nguyen, L. Nittler, M. Onose, A. Pack, C. Park, L. Piani, L. Qin, S. S. Russell, N. Sakamoto, M. Schönbachler, L. Tafla, H. Tang, K. Terada, Y. Terada, T. Usui, S. Wada, M. Wadhwa, R. J. Walker, K. Yamashita, Q.-Z. Yin, S. Yoneda, H. Yui, A.-C. Zhang, H. C. Connolly, H. Sawada, H. Senshu, Y. Shimaki, K. Shirai, S. Sugita, Y. Takei, H. Takeuchi, S. Tanaka, E. Tatsumi, F. Terui, Y. Tsuda, R. Tsukizaki, K. Wada, S.-i. Watanabe, M. Yamada, T. Yamada, Y. Yamamoto, H. Yano, Y. Yokota, K. Yoshihara, M. Yoshikawa, K. Yoshikawa, S. Furuya, K. Hatakeda, T. Hayashi, Y. Hitomi, K. Kumagai, A. Miyazaki, A. Nakato, M. Nishimura, H. Soejima, A. Suzuki, T. Yada, D. Yamamoto, K. Yogata, M. Yoshitake, S. Tachibana, H. Yurimoto, The first returned samples from a C-type asteroid show kinship to the chemically most primitive meteorites. *Science first release*, 1–8 (2022).

7. K. Lodders, Relative atomic solar system abundances, mass fractions, and atomic masses of the elements and their isotopes, composition of the solar photosphere, and compositions of the major chondritic meteorite groups. *Space Sci. Rev.* **217**, 44 (2021).

8. N. Dauphas, B. Marty, L. Reisberg, Molybdenum evidence for inherited planetary scale isotope heterogeneity of the protosolar nebula. *Astrophys. J.* **565**, 640–644 (2002).
9. M. Ek, A. C. Hunt, M. Lugaro, M. Schönbachler, The origin of *s*-process isotope heterogeneity in the solar protoplanetary disk. *Nat. Astron.* **4**, 273–281 (2020).
10. A. Trinquier, T. Elliott, D. Ulfbeck, C. Coath, A. N. Krot, M. Bizzarro, Origin of nucleosynthetic isotope heterogeneity in the solar protoplanetary disk. *Science* **324**, 374–376 (2009).
11. A. Trinquier, J.-L. Birck, C. J. Allègre, Widespread <sup>54</sup>Cr heterogeneity in the inner Solar System. *Astrophys. J.* **655**, 1179–1185 (2007).
12. C. Burkhardt, T. Kleine, F. Oberli, A. Pack, B. Bourdon, R. Wieler, Molybdenum isotope anomalies in meteorites: Constraints on solar nebula evolution and origin of the Earth. *Earth Planet. Sci. Lett.* **312**, 390–400 (2011).
13. P. H. Warren, Stable-isotopic anomalies and the accretionary assemblage of the Earth and Mars: A subordinate role for carbonaceous chondrites. *Earth Planet. Sci. Lett.* **311**, 93–100 (2011).
14. N. Dauphas, E. A. Schauble, Mass fractionation laws, mass-independent effects, and isotopic anomalies. *Annu. Rev. Earth Planet. Sci.* **44**, 709–783 (2016).
15. T. S. Kruijer, C. Burkhardt, G. Budde, T. Kleine, Age of Jupiter inferred from the distinct genetics and formation times of meteorites. *Proc. Natl. Acad. Sci. U.S.A.* **114**, 6712–6716 (2017).
16. G. Budde, C. Burkhardt, G. A. Brennecka, M. Fischer-Gödde, T. S. Kruijer, T. Kleine, Molybdenum isotopic evidence for the origin of chondrules and a distinct genetic heritage of carbonaceous and non-carbonaceous meteorites. *Earth Planet. Sci. Lett.* **454**, 293–303 (2016).
17. T. Lichtenberg, J. Drazkowska, M. Schönbachler, G. J. Golabek, T. O. Hands, Bifurcation of planetary building blocks during Solar System formation. *Science* **371**, 365–370 (2021).

18. A. Morbidelli, K. Baillié, K. Batygin, S. Charnoz, T. Guillot, D. C. Rubie, T. Kleine, Contemporary formation of early Solar System planetesimals at two distinct radial locations. *Nat. Astron.* **6**, 72–79 (2022).
19. M. Schiller, M. Bizzarro, V. A. Fernandes, Isotopic evolution of the protoplanetary disk and the building blocks of Earth and the Moon. *Nature* **555**, 501–510 (2018).
20. B. Liu, A. Johansen, M. Lambrechts, M. Bizzarro, T. Haugbølle, Natural separation of two primordial planetary reservoirs in an expanding solar protoplanetary disk. *Sci. Adv.* **8**, eabm3045 (2022).
21. A. Izidoro, R. Dasgupta, S. N. Raymond, R. Deienno, B. Bitsch, A. Isella, Planetesimal rings as the cause of the Solar System’s planetary architecture. *Nat. Astron.* **6**, 357–366 (2022).
22. M. Schiller, M. Bizzarro, J. Siebert, Iron isotope evidence for very rapid accretion and differentiation of the proto-Earth. *Sci. Adv.* **6**, eaay7604 (2020).
23. D. L. Cook, B. S. Meyer, M. Schönбächler, Iron and nickel isotopes in IID and IVB iron meteorites: Evidence for admixture of an SN II component and implications for the initial abundance of  $^{60}\text{Fe}$ . *Astrophys. J.* **917**, 59 (2021).
24. T. Hopp, N. Dauphas, F. Spitzer, C. Burkhardt, T. Kleine, Earth’s accretion inferred from iron isotopic anomalies of supernova nuclear statistical equilibrium origin. *Earth Planet. Sci. Lett.* **577**, 117245 (2022).
25. O. Eugster, Cosmic-ray exposure ages of meteorites and lunar rocks and their significance. *Geochemistry* **63**, 3–30 (2003).
26. D. L. Cook, I. Leya, M. Schönбächler, Galactic cosmic ray effects on iron and nickel isotopes in iron meteorites. *Meteorit. Planet. Sci.* **55**, 2758–2771 (2020).
27. I. Leya, M. Schönбächler, U. Wiechert, U. Krähenbühl, A. N. Halliday, Titanium isotopes and the radial heterogeneity of the solar system. *Earth Planet. Sci. Lett.* **266**, 233–244 (2008).

28. R. N. Clayton, T. K. Mayeda, Oxygen isotope studies of carbonaceous chondrites. *Geochim. Cosmochim. Acta* **63**, 2089–2104 (1999).
29. A. Shukolyukov, G. W. Lugmair, Manganese–chromium isotope systematics of carbonaceous chondrites. *Earth Planet. Sci. Lett.* **250**, 200–213 (2006).
30. L. Qin, C. M. O'D. Alexander, R. W. Carlson, M. F. Horan, T. Yokoyama, Contributors to chromium isotope variation of meteorites. *Geochim. Cosmochim. Acta* **74**, 1122–1145 (2010).
31. J. Zhang, N. Dauphas, A. M. Davis, I. Leya, A. Fedkin, The proto-Earth as a significant source of lunar material. *Nat. Geosci.* **5**, 251–255 (2012).
32. J. A. M. Nanne, F. Nimmo, J. N. Cuzzi, T. Kleine, Origin of the non-carbonaceous–carbonaceous meteorite dichotomy. *Earth Planet. Sci. Lett.* **511**, 44–54 (2019).
33. C. Burkhardt, N. Dauphas, U. Hans, B. Bourdon, T. Kleine, Elemental and isotopic variability in solar system materials by mixing and processing of primordial disk reservoirs. *Geochim. Cosmochim. Acta* **261**, 145–170 (2019).
34. M. Ito, N. Tomioka, M. Uesugi, A. Yamaguchi, N. Shirai, T. Ohigashi, M. C. Liu, R. C. Greenwood, M. Kimura, N. Imae, K. Uesugi, A. Nakato, K. Yogata, H. Yuzawa, Y. Kodama, A. Tsuchiyama, M. Yasutake, R. Findlay, I. A. Franchi, J. A. Malley, K. A. McCain, N. Matsuda, K. D. McKeegan, K. Hirahara, A. Takeuchi, S. Sekimoto, I. Sakurai, I. Okada, Y. Karouji, M. Arakawa, A. Fujii, M. Fujimoto, M. Hayakawa, N. Hirata, N. Hirata, R. Honda, C. Honda, S. Hosoda, Y. Ichi Iijima, H. Ikeda, M. Ishiguro, Y. Ishihara, T. Iwata, K. Kawahara, S. Kikuchi, K. Kitazato, K. Matsumoto, M. Matsuoka, T. Michikami, Y. Mimasu, A. Miura, O. Mori, T. Morota, S. Nakazawa, N. Namiki, H. Noda, R. Noguchi, N. Ogawa, K. Ogawa, T. Okada, C. Okamoto, G. Ono, M. Ozaki, T. Saiki, N. Sakatani, H. Sawada, H. Senshu, Y. Shimaki, K. Shirai, S. Sugita, Y. Takei, H. Takeuchi, S. Tanaka, E. Tatsumi, F. Terui, R. Tsukizaki, K. Wada, M. Yamada, T. Yamada, Y. Yamamoto, H. Yano, Y. Yokota, K. Yoshihara, M. Yoshikawa, K. Yoshikawa, R. Fukai, S. Furuya, K. Hatakeda, T. Hayashi, Y. Hitomi, K. Kumagai, A. Miyazaki, M. Nishimura, H. Soejima, A. Iwamae, D. Yamamoto, M. Yoshitake, T. Yada, M. Abe, T. Usui,

- S.-i. Watanabe, Y. Tsuda, A pristine record of outer Solar System materials from asteroid Ryugu's returned sample. *Nat. Astron.* (2022).
35. W. F. Bottke, M. Brož, D. P. O'Brien, A. C. Bagatin, A. Morbidelli, S. Marchi, The collisional evolution of the main asteroid belt, in *Asteroids IV* (University of Arizona Press, 2015), pp. 701–724.
36. N. Sugiura, W. Fujiya, Correlated accretion ages and  $\epsilon^{54}\text{Cr}$  of meteorite parent bodies and the evolution of the solar nebula. *Meteorit. Planet. Sci.* **49**, 772–787 (2014).
37. A. S. Rivkin, The fraction of hydrated C-complex asteroids in the asteroid belt from SDSS data. *Icarus* **221**, 744–752 (2012).
38. F. E. DeMeo, R. P. Binzel, S. M. Slivan, S. J. Bus, An extension of the Bus asteroid taxonomy into the near-infrared. *Icarus* **202**, 160–180 (2009).
39. S. N. Raymond, A. Izidoro, Origin of water in the inner Solar System: Planetesimals scattered inward during Jupiter and Saturn's rapid gas accretion. *Icarus* **297**, 134–148 (2017).
40. H. F. Levison, W. F. Bottke, M. Gounelle, A. Morbidelli, D. Nesvorný, K. Tsiganis, Contamination of the asteroid belt by primordial trans-Neptunian objects. *Nature* **460**, 364–366 (2009).
41. B. Liu, S. N. Raymond, S. A. Jacobson, Early Solar System instability triggered by dispersal of the gaseous disk. *Nature* **604**, 643–646 (2022).
42. D. Vokrouhlický, W. F. Bottke, D. Nesvorný, Capture of trans-Neptunian planetesimals in the main asteroid belt. *Astron. J.* **152**, 39 (2016).
43. R. de S. Ribeiro, A. Morbidelli, S. N. Raymond, A. Izidoro, R. Gomes, E. Vieira Neto, Dynamical evidence for an early giant planet instability. *Icarus* **339**, 113605 (2020).
44. J. A. Fernández, W.-H. Ip, Dynamical evolution of a cometary swarm in the outer planetary region. *Icarus* **47**, 470–479 (1981).

45. M. Duncan, T. Quinn, S. Tremaine, The formation and extent of the Solar System comet cloud. *Astron. J.* **94**, 1330–1339 (1987).

46. D. Brownlee, P. Tsou, J. Aléon, C. M. O'D. Alexander, T. Araki, S. Bajt, G. A. Baratta, R. Bastien, P. Bland, P. Bleuét, J. Borg, J. P. Bradley, A. Brearley, F. Brenker, S. Brennan, J. C. Bridges, N. D. Browning, J. R. Brucato, E. Bullock, M. J. Burchell, H. Busemann, A. Butterworth, M. Chaussidon, A. Chevront, M. Chi, M. J. Cintala, B. C. Clark, S. J. Clemett, G. Cody, L. Colangeli, G. Cooper, P. Cordier, C. Daghlian, Z. Dai, Z. Djouadi, G. Dominguez, T. Duxbury, J. P. Dworkin, D. S. Ebel, T. E. Economou, S. Fakra, S. A. J. Fairey, S. Fallon, G. Ferrini, T. Ferroir, H. Fleckenstein, C. Floss, G. Flynn, I. A. Franchi, M. Fries, Z. Gainsforth, J. Gallien, M. Genge, M. K. Gilles, P. Gillet, J. Gilmour, D. P. Glavin, M. Gounelle, M. M. Grady, G. A. Graham, P. G. Grant, S. F. Green, F. Grossemy, L. Grossman, J. N. Grossman, Y. Guan, K. Hagiya, R. Harvey, P. Heck, G. F. Herzog, P. Hoppe, F. Hörz, J. Huth, I. D. Hutcheon, K. Ignatyev, H. Ishii, M. Ito, D. Jacob, C. Jacobsen, S. Jacobsen, S. Jones, D. Joswiak, A. Jurewicz, A. T. Kearsley, L. P. Keller, H. Khodja, A. D. Kilcoyne, J. Kissel, A. Krot, F. Langenhorst, A. Lanzirotti, L. Le, L. A. Leshin, J. Leitner, L. Lemelle, H. Leroux, M.-C. Liu, K. Luening, I. Lyon, G. MacPherson, M. A. Marcus, K. Marhas, B. Marty, G. Matrajt, K. McKeegan, D. A. Papanastassiou, R. Palma, M. E. Palumbo, R. O. Pepin, D. Perkins, M. Perronnet, P. Pianetta, W. Rao, F. J. M. Rietmeijer, F. Robert, D. Rost, A. Rotundi, R. Ryan, S. A. Sandford, C. S. Schwandt, T. H. See, D. Schlutter, J. Sheffield-Parker, A. Simionovici, S. Simon, I. Sitnitsky, C. J. Snead, M. K. Spencer, F. J. Stadermann, A. Steele, T. Stephan, R. Stroud, J. Susini, S. R. Sutton, Y. Suzuki, M. Taheri, S. Taylor, N. Teslich, K. Tomeoka, N. Tomioka, A. Toppani, J. M. Trigo-Rodríguez, D. Troadec, A. Tsuchiyama, A. J. Tuzzolino, T. Tyliczszak, K. Uesugi, M. Velbel, J. Vellenga, E. Vicenzi, L. Vincze, J. Warren, I. Weber, M. Weisberg, A. J. Westphal, S. Wirick, D. Wooden, B. Wopenka, P. Wozniakiewicz, I. Wright, H. Yabuta, H. Yano, E. D. Young, R. N. Zare, T. Zega, K. Ziegler, L. Zimmerman, E. Zinner, M. Zolensky, Comet 81P/Wild 2 under a microscope. *Science* **314**, 1711–1716 (2006).

47. C. M. O'D. Alexander, R. Bowden, M. L. Fogel, K. T. Howard, C. D. K. Herd, L. R. Nittler, The provenances of asteroids, and their contributions to the volatile inventories of the terrestrial planets. *Science* **337**, 721–723 (2012).

48. D. R. Müller, K. Altwegg, J. J. Berthelier, M. Combi, J. de Keyser, S. A. Fuselier, N. Hänni, B. Pestoni, M. Rubin, I. R. H. G. Schroeder, S. F. Wampfler, High D/H ratios in water and alkanes in comet 67P/Churyumov-Gerasimenko measured with the Rosetta/ROSINA DFMS. *Astron. Astrophys.* **662**, A69 (2022).
49. L. Yang, F. J. Ciesla, C. M. O'D. Alexander, The D/H ratio of water in the solar nebula during its formation and evolution. *Icarus* **226**, 256–267 (2013).
50. D. C. Lis, D. Bockelée-Morvan, R. Güsten, N. Biver, J. Stutzki, Y. Delorme, C. Durán, H. Wiesemeyer, Y. Okada, Terrestrial deuterium-to-hydrogen ratio in water in hyperactive comets. *Astron. Astrophys.* **625**, L5 (2019).
51. R. H. Brown, D. S. Lauretta, B. Schmidt, J. Moores, Experimental and theoretical simulations of ice sublimation with implications for the chemical, isotopic, and physical evolution of icy objects. *Planet. Space Sci.* **60**, 166–180 (2012).
52. C. M. O. D. Alexander, S. D. Newsome, M. L. Fogel, L. R. Nittler, H. Busemann, G. D. Cody, Deuterium enrichments in chondritic macromolecular material—Implications for the origin and evolution of organics, water and asteroids. *Geochim. Cosmochim. Acta* **74**, 4417–4437 (2010).
53. A. J. Brearley, The action of water, in *Meteorites and the Early Solar System*, D. S. Lauretta, H. Y. McSween, Eds. (University of Arizona Press, 2006), pp. 587–624.
54. E. Nakamura, K. Kobayashi, R. Tanaka, T. Kunihiro, H. Kitagawa, C. Potiszil, T. Ota, C. Sakaguchi, M. Yamanaka, D. M. Ratnayake, H. Tripathi, R. Kumar, M. L. Avramescu, H. Tsuchida, Y. Yachi, H. Miura, M. Abe, R. Fukai, S. Furuya, K. Hatakeda, T. Hayashi, Y. Hitomi, K. Kumagai, A. Miyazaki, A. Nakato, M. Nishimura, T. Okada, H. Soejima, S. Sugita, A. Suzuki, T. Usui, T. Yada, D. Yamamoto, K. Yogata, M. Yoshitake, M. Arakawa, A. Fujii, M. Hayakawa, N. Hirata, N. Hirata, R. Honda, C. Honda, S. Hosoda, Y. I. Iijima, H. Ikeda, M. Ishiguro, Y. Ishihara, T. Iwata, K. Kawahara, S. Kikuchi, K. Kitazato, K. Matsumoto, M. Matsuoka, T. Michikami, Y. Mimasu, A. Miura, T. Morota, S. Nakazawa, N. Namiki, H. Noda, R. Noguchi, N. Ogawa, K. Ogawa, C. Okamoto, G. Ono, M. Ozaki, T. Saiki, N. Sakatani, H.

Sawada, H. Senshu, Y. Shimaki, K. Shirai, Y. Takei, H. Takeuchi, S. Tanaka, E. Tatsumi, F. Terui, R. Tsukizaki, K. Wada, M. Yamada, T. Yamada, Y. Yamamoto, H. Yano, Y. Yokota, K. Yoshihara, M. Yoshikawa, K. Yoshikawa, M. Fujimoto, S.-i. Watanabe, Y. Tsuda, On the origin and evolution of the asteroid Ryugu: A comprehensive geochemical perspective. *Proc. Jpn. Acad. Ser. B Phys. Biol. Sci.* **98**, 227–282 (2022).

55. M. Gounelle, A. Morbidelli, P. A. Bland, E. D. Young, M. Sephton, Meteorites from the outer solar system?, in *The Solar System Beyond Neptune*, M. A. Barucci, H. Boehnhardt, D. P. Cruikshank, A. Morbidelli, Eds. (Univ Arizona Press, 2008), pp. 525–541.

56. E. L. Berger, T. J. Zega, L. P. Keller, D. S. Lauretta, Evidence for aqueous activity on comet 81P/Wild 2 from sulfide mineral assemblages in Stardust samples and CI chondrites. *Geochim. Cosmochim. Acta* **75**, 3501–3513 (2011).

57. C. M. Lisse, J. Vancleve, A. C. Adams, M. F. A’hearn, Y. R. Fernández, T. L. Farnham, L. Armus, C. J. Grillmair, J. Ingalls, M. J. S. Belton, O. Groussin, L. A. Mcfadden, K. J. Meech, P. H. Schultz, B. C. Clark, L. M. Feaga, J. M. Sunshine, Spitzer spectral observations of the deep impact ejecta. *Science* **313**, 635–640 (2006).

58. I. Ferrin, C. Gil, The aging of comets Halley and Encke. *Astron. Astrophys.* **194**, 288–296 (1988).

59. T. Okada, T. Fukuhara, S. Tanaka, M. Taguchi, T. Arai, H. Senshu, N. Sakatani, Y. Shimaki, H. Demura, Y. Ogawa, K. Suko, T. Sekiguchi, T. Kouyama, J. Takita, T. Matsunaga, T. Imamura, T. Wada, S. Hasegawa, J. Helbert, T. G. Müller, A. Hagermann, J. Biele, M. Grott, M. Hamm, M. Delbo, N. Hirata, N. Hirata, Y. Yamamoto, S. Sugita, N. Namiki, K. Kitazato, M. Arakawa, S. Tachibana, H. Ikeda, M. Ishiguro, K. Wada, C. Honda, R. Honda, Y. Ishihara, K. Matsumoto, M. Matsuoka, T. Michikami, A. Miura, T. Morota, H. Noda, R. Noguchi, K. Ogawa, K. Shirai, E. Tatsumi, H. Yabuta, Y. Yokota, M. Yamada, M. Abe, M. Hayakawa, T. Iwata, M. Ozaki, H. Yano, S. Hosoda, O. Mori, H. Sawada, T. Shimada, H. Takeuchi, R. Tsukizaki, A. Fujii, C. Hirose, S. Kikuchi, Y. Mimasu, N. Ogawa, G. Ono, T. Takahashi, Y. Takei, T. Yamaguchi, K. Yoshikawa, F. Terui, T. Saiki, S. Nakazawa, M. Yoshikawa, S. Watanabe, Y.



Tsuda, Highly porous nature of a primitive asteroid revealed by thermal imaging. *Nature* **579**, 518–522 (2020).

60. D. Nesvorný, Dynamical evolution of the Early Solar System. *Annu. Rev. Astron. Astrophys.* **56**, 137–174 (2018).

61. S. Hasegawa, M. Marsset, F. E. DeMeo, S. J. Bus, J. Geem, M. Ishiguro, M. Im, D. Kuroda, P. Vernazza, Discovery of two TNO-like bodies in the asteroid belt. *Astrophys. J. Lett.* **916**, L6 (2021).

62. T. Yada, M. Abe, T. Okada, A. Nakato, K. Yogata, A. Miyazaki, K. Hatakeda, K. Kumagai, M. Nishimura, Y. Hitomi, H. Soejima, M. Yoshitake, A. Iwamae, S. Furuya, M. Uesugi, Y. Karouji, T. Usui, T. Hayashi, D. Yamamoto, R. Fukai, S. Sugita, Y. Cho, K. Yumoto, Y. Yabe, J. P. Bibring, C. Pilorget, V. Hamm, R. Brunetto, L. Riu, L. Lourit, D. Loizeau, G. Lequertier, A. Moussi-Soffys, S. Tachibana, H. Sawada, R. Okazaki, Y. Takano, K. Sakamoto, Y. N. Miura, H. Yano, T. R. Ireland, T. Yamada, M. Fujimoto, K. Kitazato, N. Namiki, M. Arakawa, N. Hirata, H. Yurimoto, T. Nakamura, T. Noguchi, H. Yabuta, H. Naraoka, M. Ito, E. Nakamura, K. Uesugi, K. Kobayashi, T. Michikami, H. Kikuchi, N. Hirata, Y. Ishihara, K. Matsumoto, H. Noda, R. Noguchi, Y. Shimaki, K. Shirai, K. Ogawa, K. Wada, H. Senshu, Y. Yamamoto, T. Morota, R. Honda, C. Honda, Y. Yokota, M. Matsuoka, N. Sakatani, E. Tatsumi, A. Miura, M. Yamada, A. Fujii, C. Hirose, S. Hosoda, H. Ikeda, T. Iwata, S. Kikuchi, Y. Mimasu, O. Mori, N. Ogawa, G. Ono, T. Shimada, S. Soldini, T. Takahashi, Y. Takei, H. Takeuchi, R. Tsukizaki, K. Yoshikawa, F. Terui, S. Nakazawa, S. Tanaka, T. Saiki, M. Yoshikawa, S.-i. Watanabe, Y. Tsuda, Preliminary analysis of the Hayabusa2 samples returned from C-type asteroid Ryugu. *Nat. Astron.* **6**, 214–220 (2022).

63. S. Weyer, J. B. Schwieters, High precision Fe isotope measurements with high mass resolution MC-ICPMS. *Int. J. Mass Spectrom.* **226**, 355–368 (2003).

64. C. Burkhardt, F. Spitzer, A. Morbidelli, G. Budde, J. H. Render, T. S. Kruijer, T. Kleine, Terrestrial planet formation from lost inner Solar System material. *Sci. Adv.* **7**, abj7601 (2021).

65. N. Dauphas, The isotopic nature of the Earth's accreting material through time. *Nature* **541**, 521–524 (2017).

66. C. Burkhardt, N. Dauphas, H. Tang, M. Fischer-Gödde, L. Qin, J. H. Chen, S. S. Rout, A. Pack, P. R. Heck, D. A. Papanastassiou, In search of the Earth-forming reservoir: Mineralogical, chemical, and isotopic characterizations of the ungrouped achondrite NWA 5363/NWA 5400 and selected chondrites. *Meteorit. Planet. Sci.* **52**, 807–826 (2017).
67. M. E. Sanborn, J. Wimpenny, C. D. Williams, A. Yamakawa, Y. Amelin, A. J. Irving, Q.-Z. Yin, Carbonaceous achondrites Northwest Africa 6704/6693: Milestones for early Solar System chronology and genealogy. *Geochim. Cosmochim. Acta* **245**, 577–596 (2019).
68. S. Gerber, C. Burkhardt, G. Budde, K. Metzler, T. Kleine, Mixing and transport of dust in the early solar nebula as inferred from titanium isotope variations among chondrules. *Astrophys. J.* **841**, L17 (2017).
69. Z. A. Torrano, D. L. Schrader, J. Davidson, R. C. Greenwood, D. R. Dunlap, M. Wadhwa, The relationship between CM and CO chondrites: Insights from combined analyses of titanium, chromium, and oxygen isotopes in CM, CO, and ungrouped chondrites. *Geochim. Cosmochim. Acta* **301**, 70–90 (2021).
70. C. D. Williams, M. E. Sanborn, C. Defouilloy, Q.-Z. Yin, N. T. Kita, D. S. Ebel, A. Yamakawa, K. Yamashita, Chondrules reveal large-scale outward transport of inner Solar System materials in the protoplanetary disk. *Proc. Natl. Acad. Sci. U.S.A.* **117**, 23426–23435 (2020).
71. A. Anand, J. Pape, M. Wille, K. Mezger, B. Hofmann, Early differentiation of magmatic iron meteorite parent bodies from Mn–Cr chronometry. *Geochem. Perspect. Lett.* **20**, 6–10 (2021).
72. C. S. Dey, Q.-Z. Yin, M. Zolensky, Exploring the planetary genealogy of Tarda—A unique new carbonaceous chondrite, in *52nd Lunar and Planetary Science Conference* (2021), p. 2548.
73. B. Mougél, F. Moynier, C. Göpel, Chromium isotopic homogeneity between the Moon, the Earth, and enstatite chondrites. *Earth Planet. Sci. Lett.* **481**, 1–8 (2018).

74. C. Göpel, J. L. Birck, A. Galy, J. A. Barrat, B. Zanda, Mn–Cr systematics in primitive meteorites: Insights from mineral separation and partial dissolution. *Geochim. Cosmochim. Acta* **156**, 1–24 (2015).
75. K. K. Larsen, A. Trinquier, C. Paton, M. Schiller, D. Wielandt, M. A. Ivanova, J. N. Connelly, Å. Nordlund, A. N. Krot, M. Bizzarro, Evidence for magnesium isotope heterogeneity in the solar protoplanetary disk. *Astrophys. J. Lett.* **735**, L37 (2011).
76. E. M. M. E. van Kooten, D. Wielandt, M. Schiller, K. Nagashima, A. Thomen, K. K. Larsen, M. B. Olsen, Å. Nordlund, A. N. Krot, M. Bizzarro, Isotopic evidence for primordial molecular cloud material in metal-rich carbonaceous chondrites. *Proc. Natl. Acad. Sci. U.S.A.* **113**, 2011–2016 (2016).
77. K. Zhu, F. Moynier, M. Schiller, D. Wielandt, K. K. Larsen, E. M. M. E. van Kooten, J.-A. Barrat, M. Bizzarro, Chromium isotopic constraints on the origin of the ureilite parent body. *Astrophys. J.* **888**, 126 (2020).
78. M. Petitat, J. L. Birck, T. H. Luu, M. Gounelle, The chromium isotopic composition of the ungrouped carbonaceous chondrite Tagish lake. *Astrophys. J.* **736**, 23 (2011).
79. K. Zhu, J. Liu, F. Moynier, L. Qin, C. M. O'D. Alexander, Y. He, Chromium isotopic evidence for an early formation of chondrules from the ornans CO chondrite. *Astrophys. J.* **873**, 82 (2019).
80. L. Qin, D. Rumble, C. M. O'D. Alexander, R. W. Carlson, P. Jenniskens, M. H. Shaddad, The chromium isotopic composition of Almahata Sitta. *Meteorit. Planet. Sci.* **45**, 1771–1777 (2010).
81. M. Schiller, E. van Kooten, J. C. Holst, M. B. Olsen, M. Bizzarro, Precise measurement of chromium isotopes by MC-ICPMS. *J. Anal. At. Spectrom* **29**, 1406–1416 (2014).
82. K. Zhu, F. Moynier, M. Schiller, C. M. O'D. Alexander, J. A. Barrat, A. Bischoff, M. Bizzarro, Mass-independent and mass-dependent Cr isotopic composition of the Rumuruti (R)

chondrites: Implications for their origin and planet formation. *Geochim. Cosmochim. Acta* **293**, 598–609 (2021).

83. J. M. Schneider, C. Burkhardt, Y. Marrocchi, G. A. Brennecke, T. Kleine, Early evolution of the solar accretion disk inferred from Cr-Ti-O isotopes in individual chondrules. *Earth Planet. Sci. Lett.* **551**, 116585 (2020).

84. E. van Kooten, L. Cavalcante, D. Wielandt, M. Bizzarro, The role of Bells in the continuous accretion between the CM and CR chondrite reservoirs. *Meteorit. Planet. Sci.* **55**, 575–590 (2020).

85. A. Yamakawa, K. Yamashita, A. Makishima, E. Nakamura, Chromium isotope systematics of achondrites: Chronology and isotopic heterogeneity of the inner solar system bodies. *Astrophys. J.* **720**, 150–154 (2010).
